# Supplementary material for: Evaluation and Identification of the Neuroprotective Compounds of Xiaoxuming Decoction by Machine Learning: A Novel Mode to Explore the Combination Rules in Traditional Chinese Medicine Prescription
Source: Biomed Res Int. 2019 Jul 10;2019:6847685. doi: 10.1155/2019/6847685 (PMC6652039; doi:10.1155/2019/6847685)
Supplement: Supplementary Materials — The supplementary materials contain the detailed information of the training sets and test sets used in the experiment, the initial evaluation of the predictive power for single algorithms and stacked models, the detailed predictions of compounds contained in XXMD, and in vitro detailed assay results. [file 6847685.f1.zip]

Archive with 2 entries (2 files):
- Figure S1_BMRI_2778851.eps
- Supplementary Materials_BMRI_2778850.docx
